# Supplementary material
Source: PubMed Central journal article supplement (PMC2658098)
Supplement: M807771200_1.pdf [file M807771200_1.pdf]

## SUPPLEMENTAL INFORMATION

### Supplemental figure legends

**Supplemental Figure 1. Alignment of deduced amino acid sequences of GR from various organisms.** Deduced amino acid sequences of GR from *Escherichia coli* *gorA*, *S. cerevisiae* *GLR1* (YPL091W), and human (GSHR\_HUMAN) were compared with that of AN0932.3 (*glrA*) from *A. nidulans*, and aligned using CLASTAL W software. Motif for active center is highlighted in red font. Other conserved motifs are boxed: yellow and red, Rossmann folds; green, motif for contacting isoalloxazine ring; blue, FAD-binding motif. Met<sup>1</sup> and Met<sup>86</sup> are shown in blue font.

**Supplemental Figure 2. Partial nucleotide and deduced amino acid sequences of *glrA*.** Red and blue fonts predicted start sites of transcription and translation (Met<sup>1</sup> and Met<sup>86</sup>), respectively.

**Supplemental Figure 3. Enzymic properties of *A. nidulans* GlrA.** A, SDS-PAGE of purified enzyme. Purified enzymes (1 µg) were resolved by SDS-PAGE on 10% polyacrylamide gels and stained with Coomassie brilliant blue. Lanes: 1, markers (Precision Protein Standard kit, Bio-Rad); 2, rGlrA. B, Superose 6 10/300 GL gel filtration of rGlrA. Circle and squares represent elution volume of rGlrA and molecular weight markers, respectively. Molecular weight markers: 1, bovine serum albumin (67 kDa); 2, ovalbumin (43 kDa); 3, carbonic anhydrase (30 kDa); 4, soybean trypsin inhibitor (20.1 kDa). C, Redox titration of rGlrA. rGlrA (38 µM) in 100 mM sodium phosphate buffer (pH 7.2) at 25°C. Visible spectra are representative of those obtained during titration by sodium dithionite. D, Spectral changes of rGlrA upon incubation with NADPH. rGlrA (38 µM) in 50 mM sodium phosphate buffer (pH 7.2) was mixed with 0.2 mM NADH under aerobic conditions. Spectra: black line, resting (oxidized); grey line, at 10 s after addition; dotted line, GSSG was added after addition of NADPH.

**Supplemental Figure 4. Two-dimensional gel electrophoresis of cell-free extracts of *A. nidulans* WT (A) and DGR1 strains (B).** Mycelia of *A. nidulans* WT (FGSC A26) and DGR1 were incubated in MMDN medium for 6 h after pre-cultivating conidia at 30°C for 20 h (WT) and 28 h (DGR1).

**Supplemental Figure 5. Two-dimensional gel electrophoresis of cell-free extracts of *A. nidulans* A26 (A) and DGR1 strains (B).** Mycelia of *A. nidulans* WT (FGSC A26) and DGR1

were incubated in MMDN medium for 6h after pre-cultivating conidia at 30°C for 20 h (WT) and 28 h (DGR1).

**Supplemental Figure 6. Phylogenetic relationship among glutathione-S-transferases from various organisms.** Multiple alignment and neighbor joining methods were performed by using Molecular Evolutionary Genetics Analysis (MEGA) Software Version 4.0 (<http://evolgen.biol.metro-u.ac.jp/MEGA/>). Accession numbers were from Broad Institute (<http://www.broad.mit.edu/annotation/fgi/>) or EMBL/GenBank/DDBJ.

# Sato et al. Supplemental Fig. 1

|                                                             |                                                                                                                                                                                                                                                                                                                                                                                   |
|-------------------------------------------------------------|-----------------------------------------------------------------------------------------------------------------------------------------------------------------------------------------------------------------------------------------------------------------------------------------------------------------------------------------------------------------------------------|
| ANO932.3<br><i>S. cerevisiae</i><br>Human<br><i>E. coli</i> | MLSRSSLRSLSAQASKIRLTRSSLVCSPI TQSNRAYTSYGIATRNGKRGVLDSSSRSAIS<br>MLSATKQTFRSLQIRTMSTN<br>MALLPRALSAGAGPSWRRAARAFRG FLLLLP                                                                                                                                                                                                                                                         |
| ANO932.3<br><i>S. cerevisiae</i><br>Human<br><i>E. coli</i> | TPTGLRLASLTRQFSSTSPAANSSNMPVETKQYDYIVLGGGSGGSGSRRRAAGHYGAKT<br>TKHYDYLVIGGGSGGVASARRAASYG-AKT<br>EPAALTRALSRAMACRQEPQPGPPPAAGAVASYDYLVIGGGSGGLASARRAELG-ARA<br>MTKHYDYIAIGGGSGGIASINRAAMYG-KGC                                                                                                                                                                                    |
| ANO932.3<br><i>S. cerevisiae</i><br>Human<br><i>E. coli</i> | LIVESGRAGGT <b>CNVVGC</b> VPKKMTWNFASITESIEAGRHYGYDL PHNIDVNYTHFK<br>LLVEAKALGGT <b>CNVVGC</b> VPKKVMYASDLATRVSHANEYGLYQNLPLDKEHLTFMWPEFK<br>AVVESHKLGGT <b>CNVVGC</b> VPKKVMNTAVHSEFMHDH-ADYGFPSCEG KFNMRVVIK<br>ALIEAKELGGT <b>CNVVGC</b> VPKKVMHAAQIREAIIHMYGPDYGFDTTIN KFNWETLI                                                                                               |
| ANO932.3<br><i>S. cerevisiae</i><br>Human<br><i>E. coli</i> | KLRDSTIERLNGVYEKNWGNELDLVHGRARFVEKKTIEVTNQDGSRTRYTAPHIL IATG<br>QKRDAYVHRLNGIYQKNLEKEKVDVFGHARFNKDGNEVEQKRDNTTEVSANHILVATG<br>EKRDAYVSRNLNAYQNNLTKSHIEIRGHAAFTSDPKPTIEVSGKKYTAPHIL IATG<br>ASRTAYIDRIHTSYENVLGNVNDVIKGFARFVD AKTLEVNGETITADHIL IATG                                                                                                                               |
| ANO932.3<br><i>S. cerevisiae</i><br>Human<br><i>E. coli</i> | GRPSLPD IKGSEHGISSDGFEEI EELPPKLAWGAGYI AVELAGVMGTVGVDTHMFI<br>GKAIFPEN IPGFELGTDSDGFFRLEEQPKVWVWAGYI GIELAGVFHGLGSETHLVI<br>GMPSTPHESQIPGASLGI TSDGFFGLEELPGRSVIVGAGYI AVEVAGI L SALGSKTSLMI<br>GRPSHP DIPGVEYGI DSDGFFALPALPERVAWVWAGYI AVELAGVINGLGAKTHLIV                                                                                                                     |
| ANO932.3<br><i>S. cerevisiae</i><br>Human<br><i>E. coli</i> | RGETFLRKFDPMI QKTMTERYEAVGIHVHKHPG I KEVQLLR DGKGDKLLK I MNDG<br>RGETVLRKFDECI QNTI TDHYVKEGI NVHKLS KIVKVE KIVETDKLKI HMNDSK<br>RHDKVLRSFDSMI STNCTELENAGVEVLKFSQVKEVKKLSGLEVSMVAVPGRLPVMT<br>RKHAPLRSFDPMI SETLVEVMNAEGPQLHTNAIPKAVVKNTDGSLELEEDGR                                                                                                                              |
| ANO932.3<br><i>S. cerevisiae</i><br>Human<br><i>E. coli</i> | SEMEV <b>ELLWA</b> GRV <b>EVEDLHLE</b> IPGVELNKSGHWVDEYQNTNVEGI <b>YAI</b> GDVTGQAE<br>SIDDV <b>DEL</b> IWTI <b>GRKSHLG</b> MGSENVGIKLNSHDQI <b>IADEYQNTNVPNI</b> YSLGDVVGKVE<br>MIPDV <b>GLLWA</b> GRV <b>PNTKDL</b> SLNKLGIQTDDKGHI <b>IVDEFQNTNVKGI</b> YAVGDVCGKAL<br>-SETV <b>DGL</b> I <b>WAI</b> <b>GREP</b> ANDNINLEAAGVKTNEKGYI <b>VVDKYQNTN</b> I <b>EGI</b> YAVGNTGAVE |
| ANO932.3<br><i>S. cerevisiae</i><br>Human<br><i>E. coli</i> | LTPVAIAAGRQLGNRLFGGPQFKNAKLSYDNIPTWVFSHPVEGTVGLTEPQARERFGDEN<br>LTPVAIAAGRKLSNRLFGEKFRNDKLDYENVPSVIFSHPEAGSIGISEKEAIEKYGKEN<br>LTPVAIAAGRKLAHRLFYK-EDSKLDYNNIPTWVFSHPPIGTVGLTEDEAIEHKYGIEN<br>LTPVAIAAGRRLSERLFNKK-PDEHLDYSNIPTWVFSHPPIGTVGLTEPQAREGYGDDQ                                                                                                                         |
| ANO932.3<br><i>S. cerevisiae</i><br>Human<br><i>E. coli</i> | VKYYHTRFPAMFYSVFPPEEKAKNPTEFKMNVAGPEEKVVGLHLLGLGVGEMTQGFVAV<br>IKVYNSKFTAMYAMLSE-KSPTRYKIVCAGPNEKVVGLHIVGDSSAEILQGFVAVI<br>VKTYSTSFTPMYHAVTKR-KTKCVMKMVCANKEEKVVGIIHMQGLGCDEMLQGFVAV<br>VKVYKSSFTAMYTAVTTH-RQPCRMKLCVVGSEEKIVGIIHGIGFGMDEMMLQGFVAV                                                                                                                                |
| ANO932.3<br><i>S. cerevisiae</i><br>Human<br><i>E. coli</i> | KMGATKKDFDSCVAIHPTSAEELVTLR<br>KMGATKADFNCVAIHPTSAEELVTMR<br>KMGATKADFNTVAIHPTSSEELVTLR<br>KMGATKKDFDNTVAIHPTAAEEFVTMR                                                                                                                                                                                                                                                            |



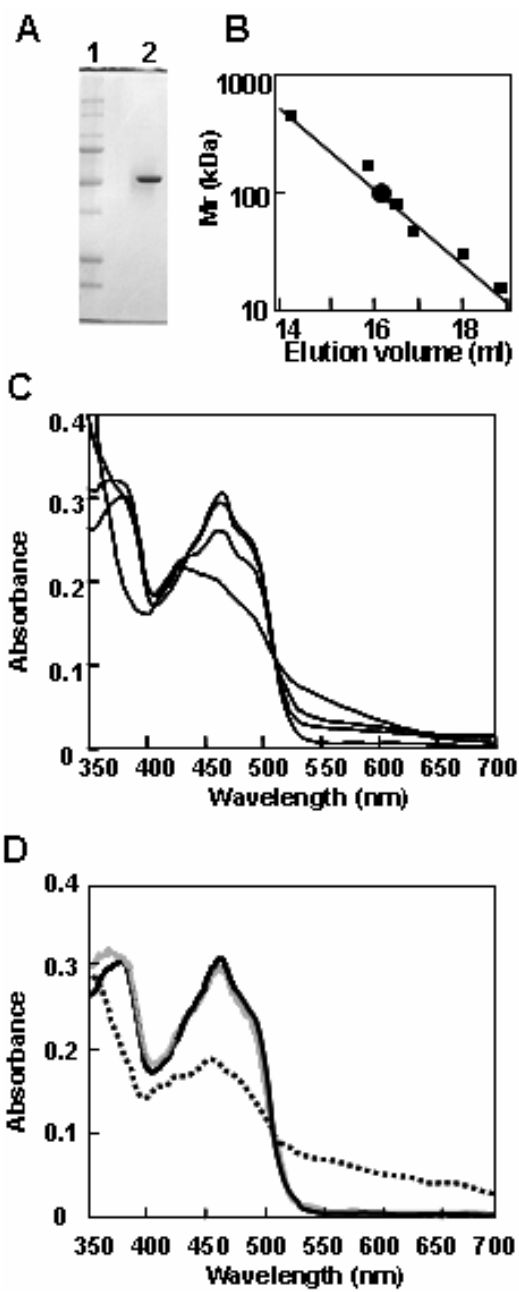

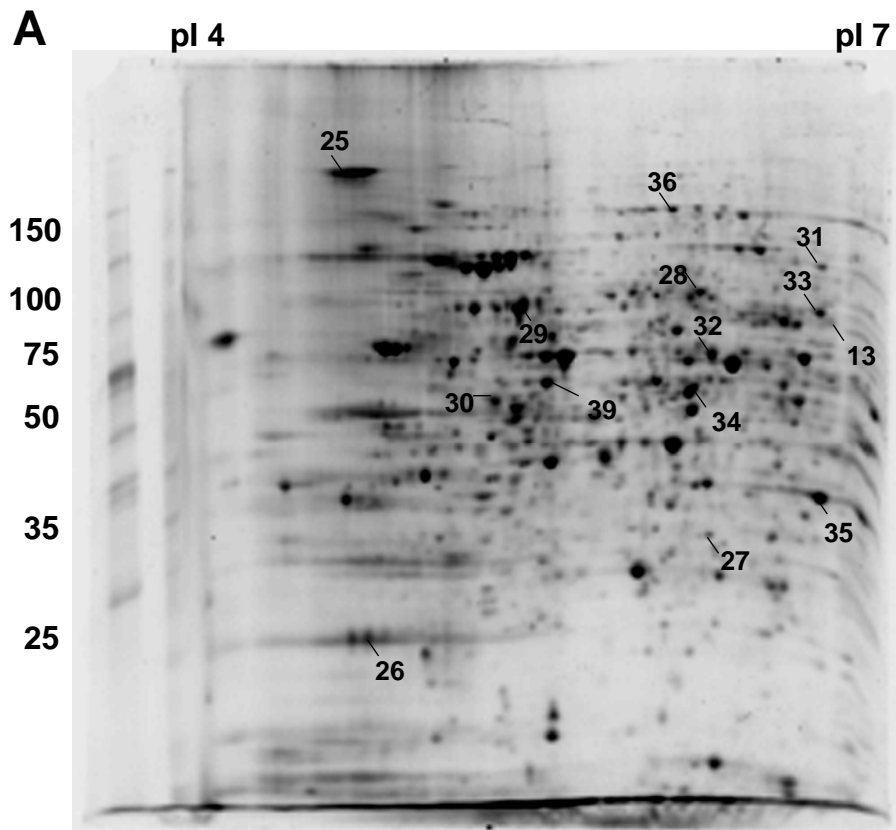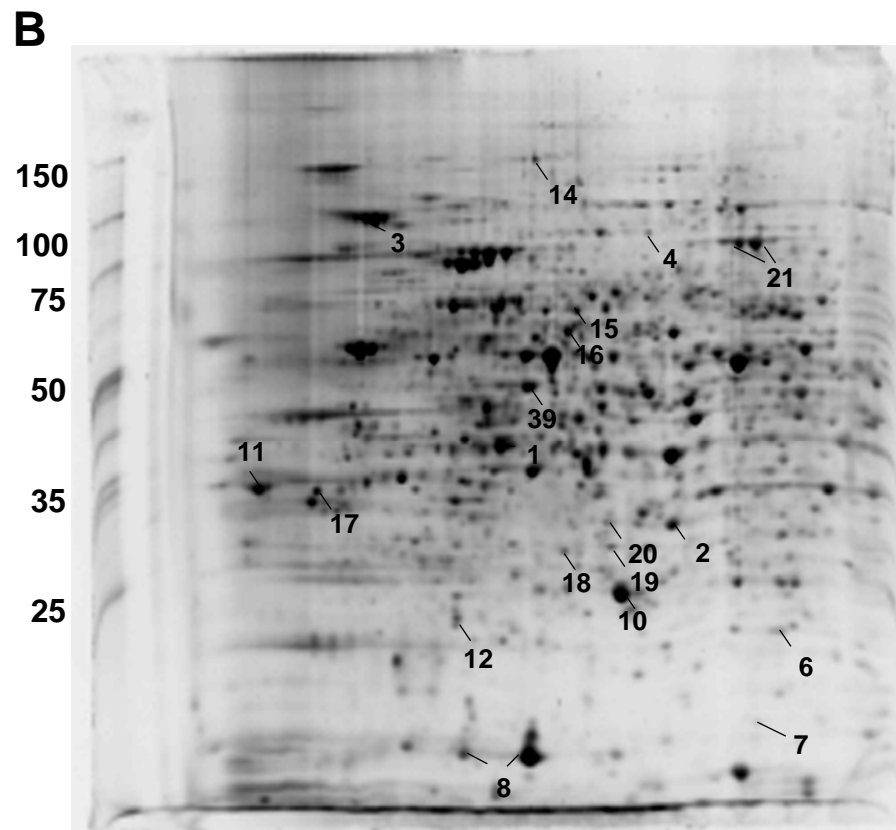

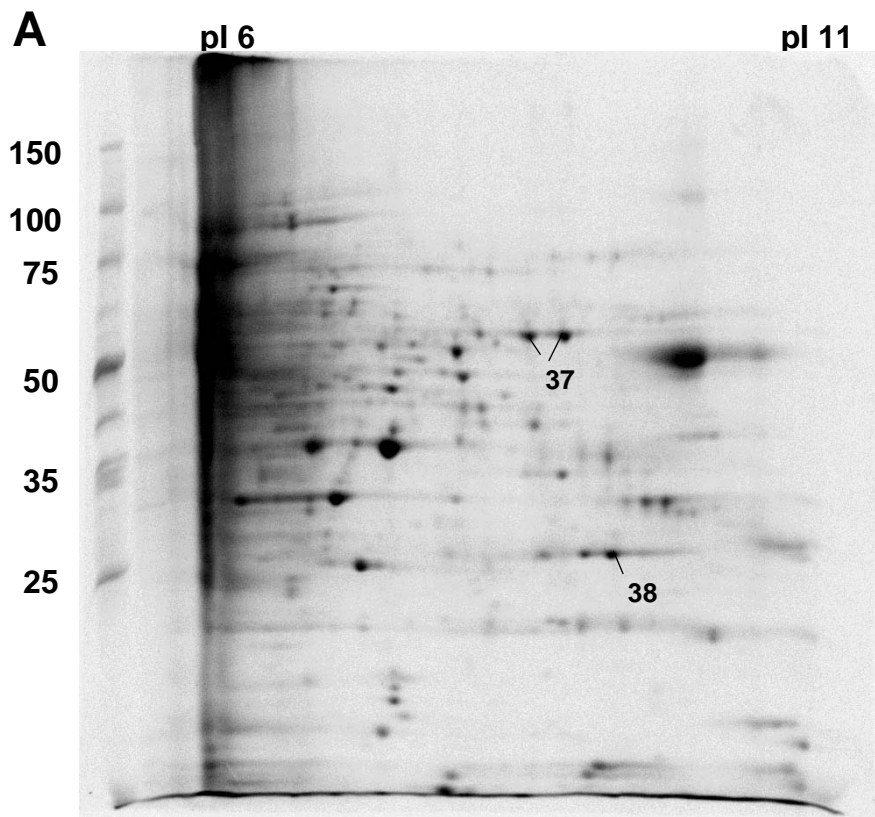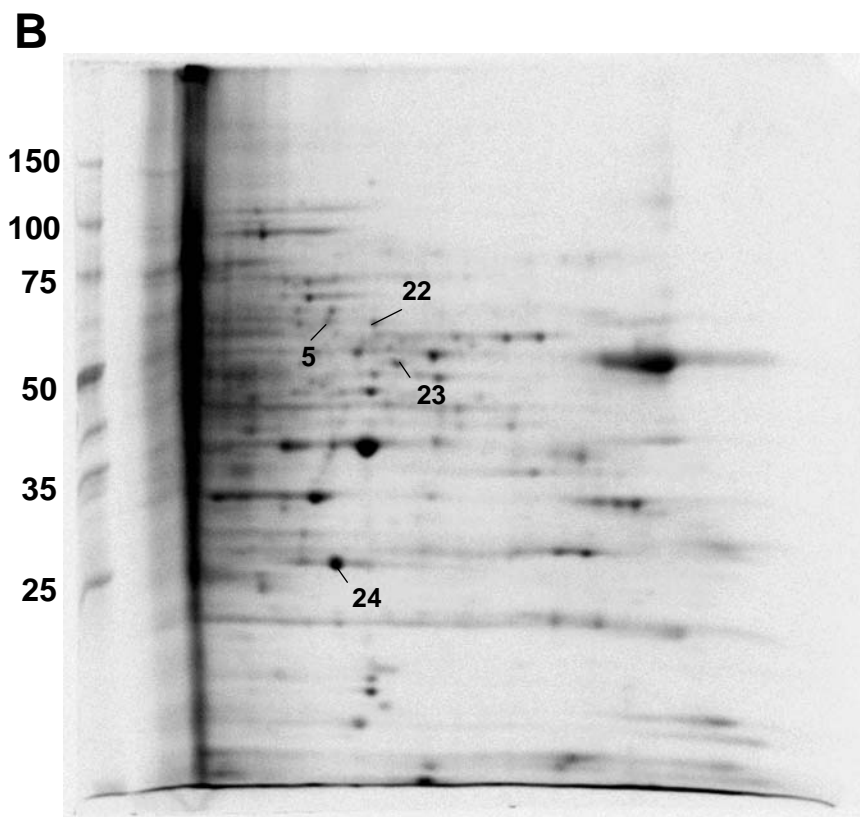

# Sato et al. Supplemental Fig. 6

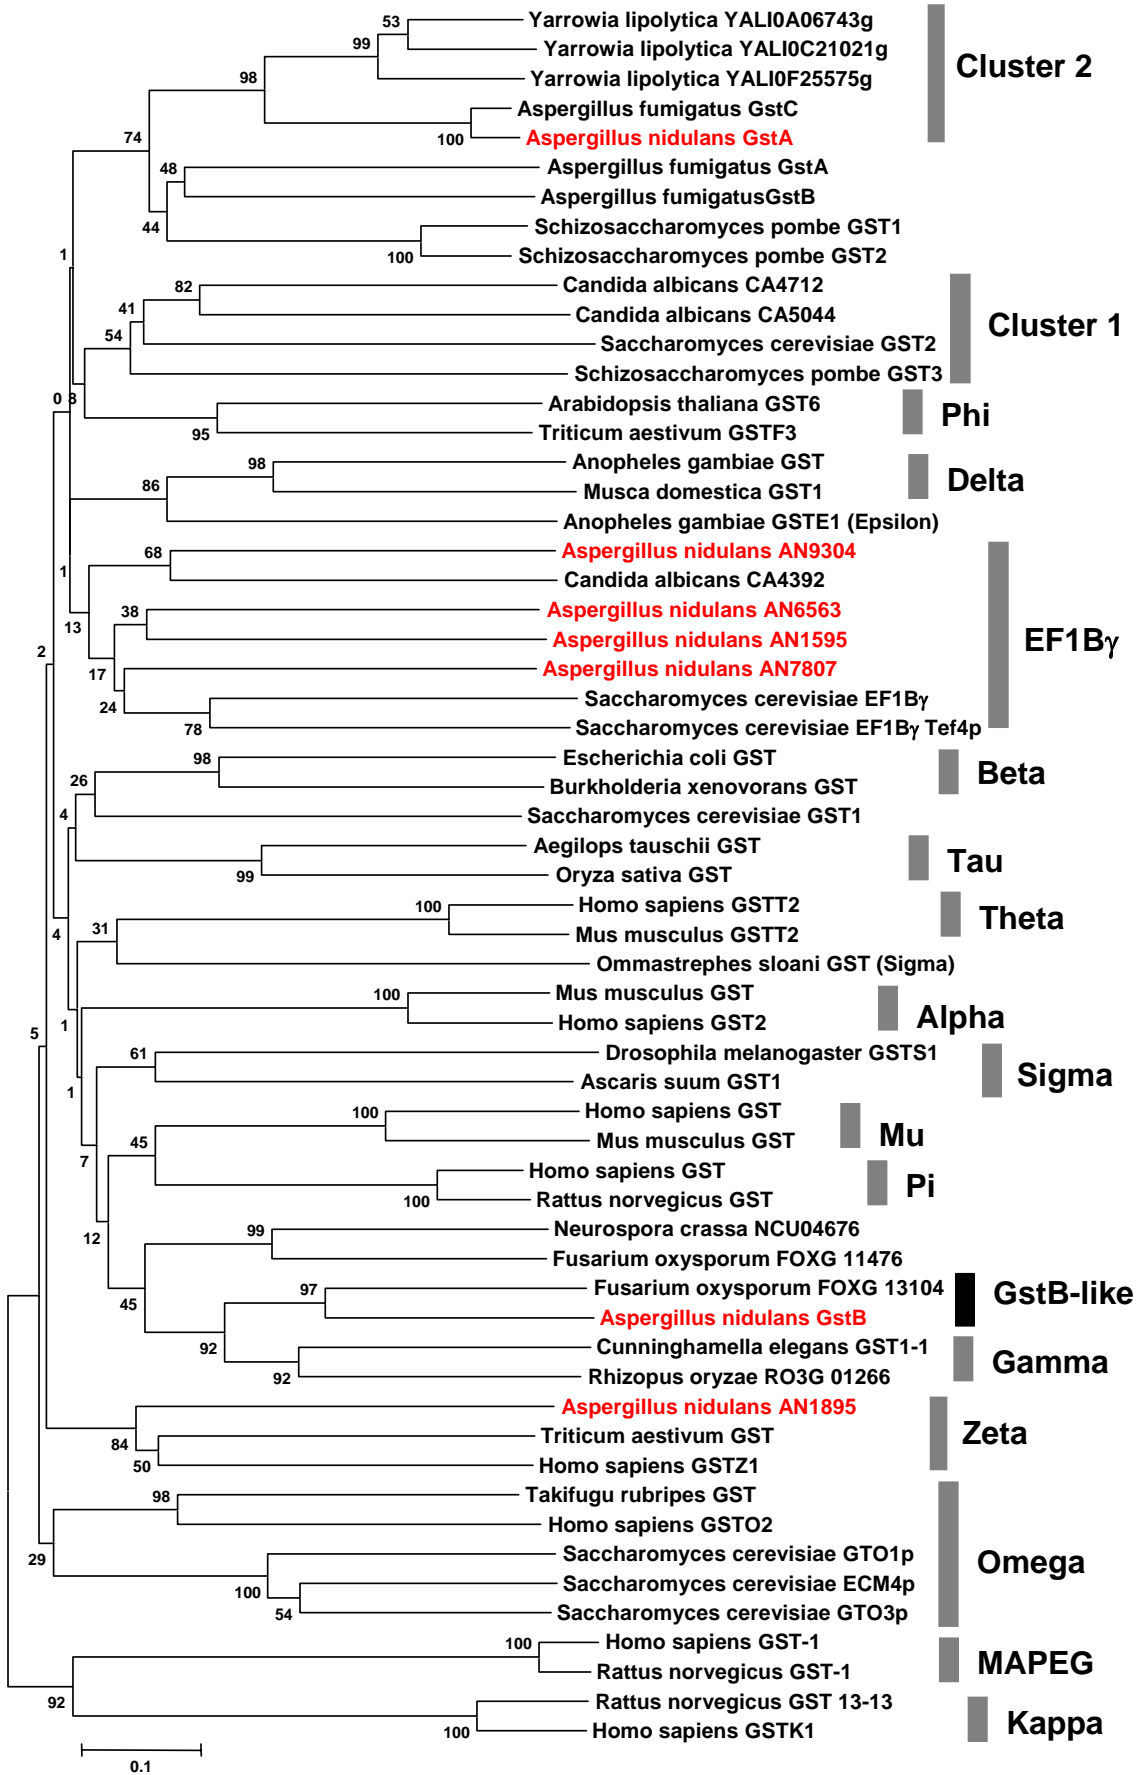



Supplemental Table 1 Distribution of predicted GST proteins among fungi

Predicted GST proteins from *A. nidulans* were compared with fungal genome nucleotide sequences published in Broad Institute (<http://www.broad.mit.edu/annotation/fgi/>), and more than 30% identical proteins to them are shown. Accession numbers are from Broad Institute. Identities are shown below accession numbers in percents. Blank; corresponding proteins were not found.

**Ascomycetes**

| <i>Aspergillus nidulans</i> | Class         | <i>Aspergillus terreus</i> | <i>Botrytis cinerea</i> | <i>Candida albicans</i> | <i>Candida tropicalis</i> | <i>Chaetomium globosum</i> | <i>Coccidioides immitis</i> | <i>Fusarium graminearum</i> | <i>Fusarium oxysporum</i> | <i>Fusarium verticilloides</i> | <i>Histoplasma capsulatum</i> | <i>Lodderomyces elongisporus</i> |
|-----------------------------|---------------|----------------------------|-------------------------|-------------------------|---------------------------|----------------------------|-----------------------------|-----------------------------|---------------------------|--------------------------------|-------------------------------|----------------------------------|
| AN3299                      | alpha         | AATEG_07534.1<br>64        | BC1G_12605.1<br>60      |                         |                           | CHG06688.1<br>45           |                             | FGSG_00172<br>45            | FOXG_01307<br>50          | FVEG_00186<br>49               |                               |                                  |
| AN3849                      | kappa         | AATEG_05408.1<br>60        | BC1G_12830.1<br>42      |                         |                           | CHG10295.1<br>42           | CIMG_08781.2<br>49          |                             |                           |                                | HCAG_06266.1<br>45            |                                  |
| AN5831                      | omega         | AATEG_06899.1<br>79        | BC1G_03433.1<br>38      | CAWG_01559<br>45        | CTRG_00896.3<br>46        | CHG04901.1<br>35           | CIMG_00933.2<br>67          | FGSG_04433<br>56            | FOXG_13780<br>56          | FVEG_11213<br>56               | HCAG_07421.1<br>67            | LELG_00071.1<br>*48              |
| AN10273                     | omega         | AATEG_02453.1<br>90        | BC1G_03433.1<br>55      | CAWG_01559<br>56        | CTRG_00896.3<br>56        | CHG04901.1<br>63           | CIMG_00293.2<br>73          | FGSG_09688<br>66            | FOXG_08382<br>67          | FVEG_06294<br>67               | HCAG_01006.1<br>76            | LELG_00071.1<br>55               |
| AN10379                     | omega         | AATEG_02453.1<br>46        | BC1G_09470.1<br>52      | CAWG_01559<br>49        | CTRG_00896.3<br>48        | CHG04901.1<br>40           | CIMG_00293.2<br>42          | FGSG_09688<br>43            | FOXG_16651<br>63          | FVEG_13590<br>62               | HCAG_01006.1<br>42            | LELG_00071.1<br>47               |
| AN6024<br>( <i>gstB</i> )   | GstB-like     | AATEG_06528.1<br>69        | BC1G_05767.1<br>35      |                         |                           |                            |                             | *FGSG_03802<br>58           | FOXG_13104<br>57          | *FVEG_12937<br>61              |                               |                                  |
| AN9299                      | cluster 2     | AATEG_03359.1<br>71        | BC1G_09645.1<br>38      | CAWG_03499<br>40        | CTRG_00284.3<br>40        | CHG07334.1<br>49           | CIMG_03767.2<br>46          | FGSG_02000<br>47            | FOXG_04328<br>47          | FVEG_07456<br>47               |                               | LELG_04375.1<br>41               |
| AN4905<br>( <i>gstA</i> )   | cluster 2     | AATEG_04611.1<br>82        | BC1G_09645.1<br>43      | CAWG_03499<br>45        | CTRG_00284.3<br>49        | CHG07334.1<br>62           | CIMG_03767.2<br>71          | FGSG_02000<br>57            | FOXG_04328<br>57          | FVEG_07456<br>56               | HCAG_02355.1<br>35            | LELG_04376.1<br>47               |
| AN1595                      | EF1B $\gamma$ | AATEG_06992.1<br>49        | BC1G_00939.1<br>42      | CAWG_02910<br>31        |                           | CHG07289.1<br>44           | CIMG_02699.2<br>44          | FGSG_07401<br>35            |                           | FVEG_07856<br>36               | HCAG_08236.1<br>37            | LELG_02811.1<br>32               |
| AN6563                      | EF1B $\gamma$ | AATEG_06992.1<br>81        | BC1G_00939.1<br>54      | CAWG_02910<br>45        | CTRG_02705.3<br>46        | CHG07289.1<br>50           | CIMG_02699.2<br>57          | FGSG_07401<br>49            | FOXG_01492<br>50          | FVEG_07856<br>52               | HCAG_08236.1<br>57            | LELG_02811.1<br>46               |
| AN7807                      | EF1B $\gamma$ | AATEG_06992.1<br>39        | BC1G_00939.1<br>44      | CAWG_02910<br>34        | CTRG_02705.3<br>33        | CHG07289.1<br>42           | CIMG_02699.2<br>40          | FGSG_07401<br>40            | FOXG_01492<br>39          | FVEG_07856<br>42               | HCAG_08236.1<br>42            | LELG_02811.1<br>35               |
| AN9304                      | EF1B $\gamma$ | AATEG_05085.1<br>77        | BC1G_10460.1<br>44      |                         |                           | CHG02356.1<br>42           |                             | FGSG_13223<br>44            |                           | FVEG_11084<br>45               |                               |                                  |
| AN10038                     | EF1B $\gamma$ | AATEG_06992.1<br>30        | BC1G_00939.1<br>38      |                         |                           | CHG07289.1<br>37           | CIMG_02699.2<br>38          | FGSG_07401<br>34            |                           | FVEG_07856<br>35               | HCAG_08236.1<br>36            | LELG_02811.1<br>32               |
| AN3255                      | Ure2p         | AATEG_06384.1<br>44        |                         | CAWG_04225<br>34        | CTRG_01617.3<br>34        | CHG09399.1<br>55           | CIMG_00771.2<br>51          | FGSG_01816<br>40            | FOXG_10072<br>44          | FVEG_08420<br>39               | HCAG_02355.1<br>74            | LELG_01948.1<br>34               |
| AN6612                      | MAK16         | AATEG_07051.1<br>94        | BC1G_08156.1<br>84      | CAWG_04380.1<br>68      | CTRG_01790.3<br>66        | CHGG_07201.1<br>69         | CIMG_10174.3<br>71          | FGSG_05193.3<br>69          | FOXG_07948.2<br>73        | FVEG_04866.3<br>73             | HCAG_05122.1<br>89            | LELG_01895.1<br>67               |
| AN1895                      | MAAI          | AATEG_05925.1<br>64        |                         |                         |                           |                            | CIMG_01314.2<br>50          | FGSG_02852<br>49            | FOXG_15752<br>47          | FVEG_13215<br>47               | HCAG_02121.1<br>53            |                                  |
| AN10695                     | MAPEG         | AATEG_03896.1<br>77        | BC1G_03423.1<br>63      |                         |                           | CHG02754.1<br>35           | CIMG_01614.2<br>68          | FGSG_01294<br>40            | FOXG_11417<br>42          | FVEG_10403<br>48               | HCAG_01368.1<br>36            |                                  |
| AN3298                      | unclassified  | AATEG_05146.1<br>60        | BC1G_04672.1<br>42      |                         |                           |                            | CIMG_03351.2<br>63          | FGSG_07224<br>33            | FOXG_17209<br>61          | FVEG_05362<br>31               | HCAG_02776.1<br>47            |                                  |

\* Another orthologs were found (FGSG\_11062 (53%), FVEG\_12433 (56%), RO3G\_08558.1 (32%%)).

Supplemental Table 1 Distribution of predicted GST proteins among fungi (continued)

| <i>Aspergillus nidulans</i> | Class         | Basidiomycetes            |                          |                                 |                                         |                                      |                            |                         | Chytridiomycetes                          | Zygomycetes            |                                       |                        |
|-----------------------------|---------------|---------------------------|--------------------------|---------------------------------|-----------------------------------------|--------------------------------------|----------------------------|-------------------------|-------------------------------------------|------------------------|---------------------------------------|------------------------|
|                             |               | <i>Magnaporthe grisea</i> | <i>Neurospora crassa</i> | <i>Sclerotinia sclerotiorum</i> | <i>Saccharomyces cerevisiae</i> RM11-1a | <i>Schizosaccharomyces japonicus</i> | <i>Ucinocaropus reesii</i> | <i>Coprinus cinerea</i> | <i>Cryptococcus neoformans</i> Serotype A | <i>Ustilago maydis</i> | <i>Batrachochytrium dendrobatidis</i> | <i>Rhizopus oryzae</i> |
| AN3299                      | alpha         |                           |                          | SS1G_01922.1<br>41              |                                         |                                      |                            | CC1G_10591.1<br>35      |                                           |                        |                                       |                        |
| AN3849                      | kappa         |                           | NCU01636<br>49           | SS1G_09579.1<br>42              |                                         |                                      | UREG_02764.1<br>47         |                         | UM05678.1<br>31                           |                        |                                       |                        |
| AN5831                      | omega         | MGG_01410.5<br>47         | NCU04368<br>46           | SS1G_08258.1<br>*50             | SCRG_02146<br>38                        |                                      | UREG_00366.1<br>37         | CC1G_11081.1<br>42      | CNAG_01889.1<br>46                        | UM01515.1<br>47        | RO3G_13689.1<br>*53                   |                        |
| AN10273                     | omega         | MGG_01410.5<br>68         | NCU04368<br>64           | SS1G_08258.1<br>59              | SCRG_04091<br>48                        |                                      | UREG_00366.1<br>71         | CC1G_11081.1<br>55      | CNAG_01893.1<br>55                        | UM01515.1<br>48        | RO3G_13689.1<br>56                    |                        |
| AN10379                     | omega         | MGG_02244.5<br>62         | NCU04368<br>45           | SS1G_05554.1<br>58              | SCRG_04091<br>39                        |                                      |                            | CC1G_11081.1<br>46      | CNAG_01893.1<br>46                        | UM01515.1<br>39        | RO3G_13689.1<br>44                    |                        |
| AN6024<br>( <i>gstB</i> )   | GstB-like     |                           |                          |                                 |                                         |                                      |                            |                         |                                           |                        | *RO3G_01266.1<br>33                   |                        |
| AN9299                      | cluster 2     | MGG_06747.5<br>44         | NCU04109<br>43           | SS1G_07195.1<br>47              |                                         |                                      | UREG_07517.1<br>47         | CC1G_00666.1<br>40      | CNAG_04110.1<br>39                        |                        | BDEG_08491<br>43                      |                        |
| AN4905<br>( <i>gstA</i> )   | cluster 2     | MGG_06747.5<br>57         | NCU05780<br>39           | SS1G_07195.1<br>65              | SCRG_03353                              | SJAG_00238<br>38                     | UREG_07517.1<br>70         | CC1G_00666.1<br>44      | CNAG_04110.1<br>44                        | UM06325.1<br>39        | BDEG_08491<br>44                      | RO3G_09910.1           |
| AN1595                      | EF1B $\gamma$ | MGG_06936.5<br>41         | NCU03826<br>42           | SS1G_00220.1<br>62              |                                         |                                      | UREG_03068.1<br>39         |                         |                                           |                        |                                       |                        |
| AN6563                      | EF1B $\gamma$ | MGG_06936.5<br>50         | NCU03826<br>52           | SS1G_00220.1<br>54              | SCRG_02444<br>43                        | SJAG_02017<br>37                     | UREG_03068.1<br>52         | CC1G_01604.1<br>39      | CNAG_00417.1<br>37                        | UM02442.1<br>37        | BDEG_06207<br>36                      | RO3G_13129.1<br>37     |
| AN7807                      | EF1B $\gamma$ | MGG_06936.5<br>40         | NCU03826<br>42           | SS1G_00220.1<br>44              | SCRG_02444<br>31                        |                                      | UREG_03068.1<br>41         |                         |                                           |                        | BDEG_06207<br>32                      | RO3G_09910.1<br>31     |
| AN9304                      | EF1B $\gamma$ | MGG_12569.5<br>38         | NCU10521<br>39           |                                 |                                         |                                      |                            | CC1G_01604.1<br>36      |                                           |                        | BDEG_06207<br>35                      | RO3G_13129.1<br>39     |
| AN10038                     | EF1B $\gamma$ | MGG_06936.5<br>32         | NCU03826<br>34           | SS1G_00220.1<br>38              |                                         |                                      | UREG_03068.1<br>32         |                         |                                           |                        |                                       |                        |
| AN3255                      | Ure2p         | MGG_09138.5<br>44         | NCU05780<br>44           | SS1G_10108.1<br>52              | SCRG_03353<br>36                        | SJAG_00179<br>41                     | UREG_00745.1<br>51         |                         |                                           |                        |                                       |                        |
| AN6612                      | MAK16         | MGG_04069<br>59           | NCU04150<br>62           | SS1G_08782<br>70                | SCRG_05659.1<br>66                      | SJAG_00689.2<br>64                   | UREG_03547.1<br>86         |                         |                                           | UM05387.1<br>56        | BDEG_01326.1<br>54                    | RO3G_16892.1<br>65     |
| AN1895                      | MAAI          |                           |                          |                                 |                                         |                                      | UREG_01240.1<br>51         |                         |                                           |                        | BDEG_01302<br>38                      | RO3G_11518.1<br>33     |
| AN10695                     | MAPEG         | MGG_05367.5<br>43         | NCU00549<br>39           | SS1G_06623.1<br>65              |                                         |                                      | UREG_03256.1<br>39         | CC1G_06890.1<br>44      | CNAG_06238.1<br>37                        | UM01870.1<br>48        |                                       |                        |
| AN3298                      | unclassified  | MGG_06383.5<br>35         | NCU06494<br>35           | SS1G_12640.1<br>43              |                                         |                                      | UREG_07177.1<br>60         |                         |                                           |                        | BDEG_08674<br>35                      |                        |
